# Supplementary material
Source: Springer Nature journal article supplement (https://www.springermedizin.de/resource/supplementary/12885_2013_4394_MOESM6_ESM.pdf/9466188)

# A Cisplatin Treatment

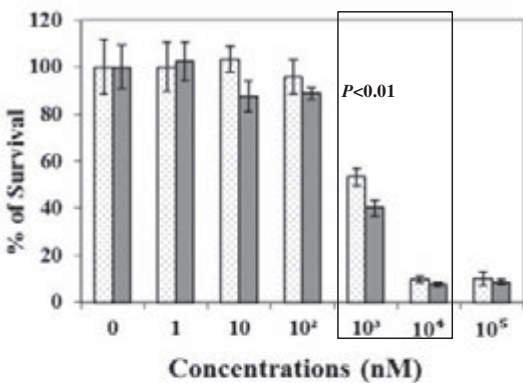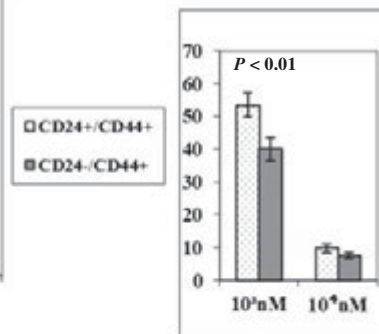

# B Gemcitabine Treatment

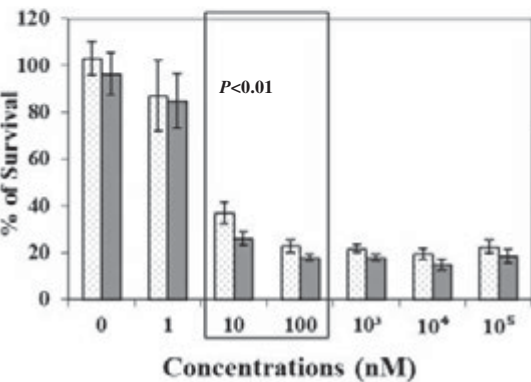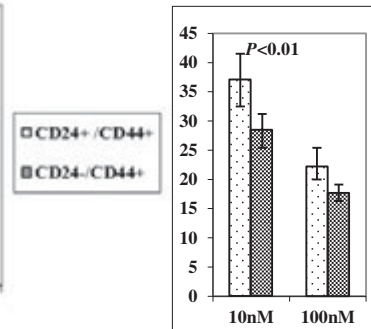

Supplement: MOESM6 [file 9466188]
